# Supplementary material
Source: PubMed Central journal article supplement (PMC4142780)
Supplement: Supp_Fig2.pdf [file Supp_Fig2.pdf]

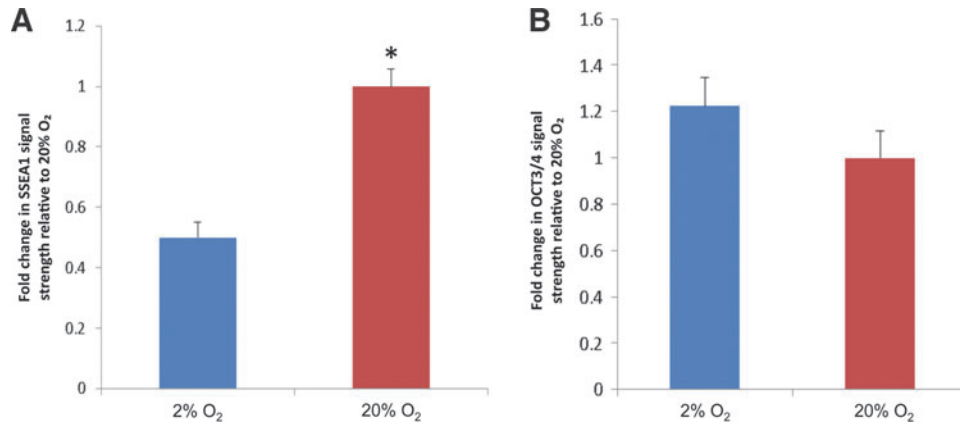

**SUPPLEMENTARY FIG. S2.** Low O<sub>2</sub> promotes maintenance of an undifferentiated state in human embryonic stem cells (hESCs). hESCs were grown in feeder-free conditions in low (2%) and high (20%) O<sub>2</sub> tensions for 96 h. Densitometric analysis of immunofluorescent intensities revealed the relative culture area occupied by stage-specific embryonic antigen 1 (SSEA1) (A) and OCT3/4 (B) for hESCs cultured in 2% and 20% O<sub>2</sub> atmospheres. Error bars represent SD, *n* = 3, \**P* < 0.05.
