# Supplementary material
Source: PubMed Central journal article supplement (PMC4142780)
Supplement: Supp_Fig3.pdf [file Supp_Fig3.pdf]

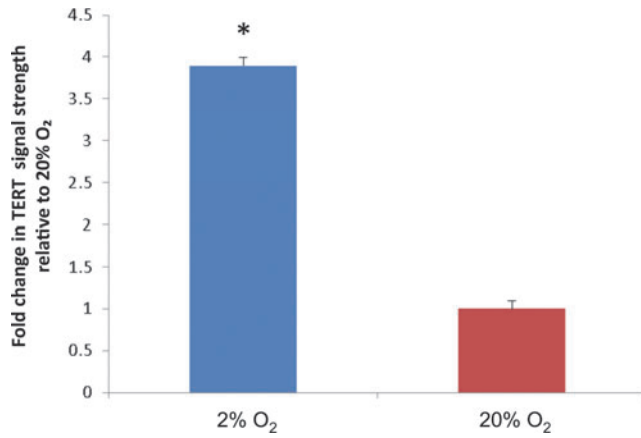

**SUPPLEMENTARY FIG. S3.** Low-O<sub>2</sub> microenvironments elevate total TERT protein levels in hESCs. hESCs were grown in feeder-free conditions in high (20%) and low (2%) O<sub>2</sub> microenvironments for 96 h to monitor TERT protein abundance. Mean fluorescence intensity plots derived from densitometric analysis of TERT immunofluorescent microscopic images of hESCs grown in 2% and 20% O<sub>2</sub>. Error bars represent standard error (SE),  $n=3$ ,  $*P<0.05$ .
