# Supplementary material
Source: PubMed Central journal article supplement (PMC4142780)
Supplement: Supp_Fig4.pdf [file Supp_Fig4.pdf]

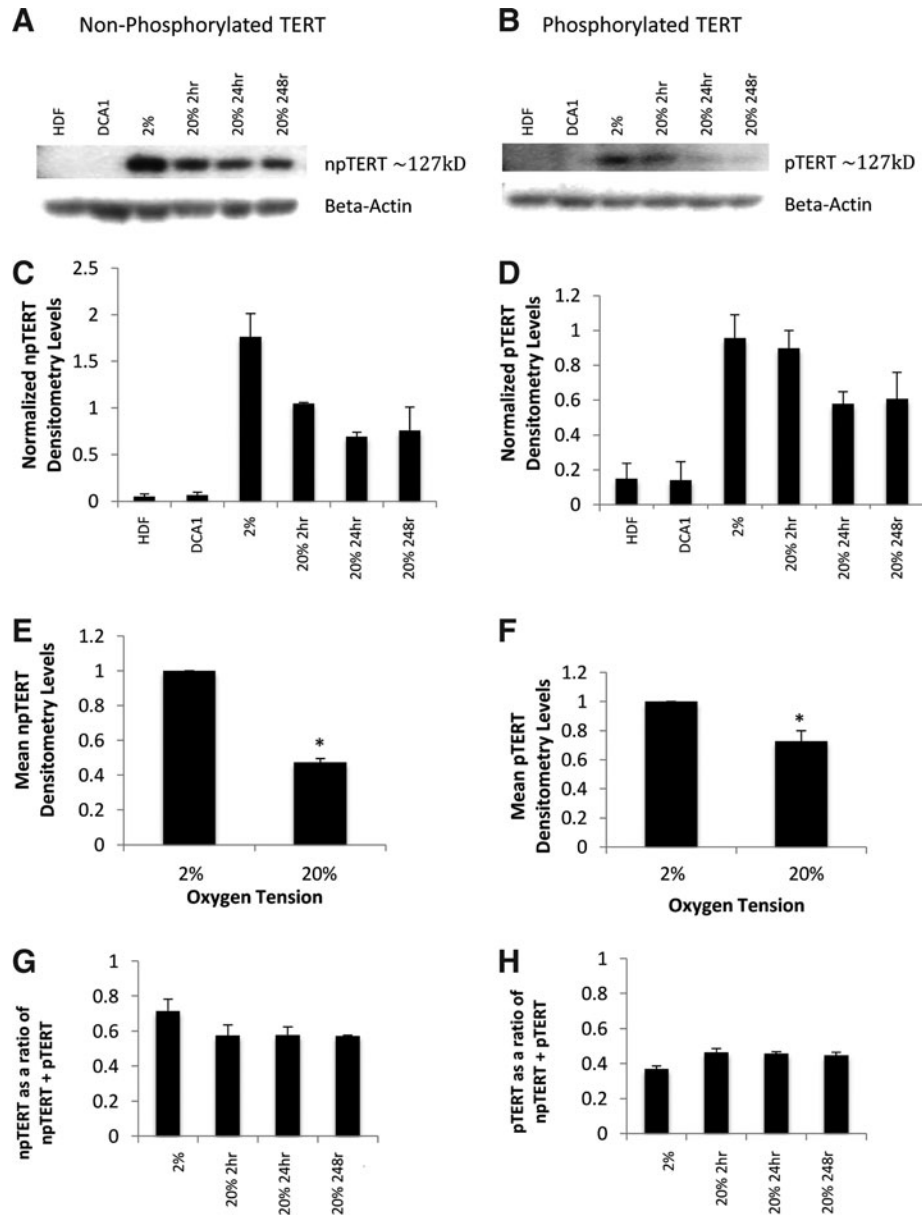

**SUPPLEMENTARY FIG. S4.** Total TERT protein levels in 2% O<sub>2</sub>-cultured hESCs decrease when cells are exposed to 20% O<sub>2</sub>. Representative western blot analyses of nonphosphorylated TERT (**A**) and phospho-TERT (**B**) in pluripotent hESCs cultured for varying exposure times in 20% O<sub>2</sub> after 2% O<sub>2</sub> culture using primary antibodies (Abgent, Inc.) against nonphosphorylated (np)TERT (Y707) and phosphorylated (p)TERT (Y707). HDFs, human dermal fibroblasts; DCA1, differentiated CA1 hESCs. The expected hTERT band of ~127 kDa was detected. TERT protein bands were normalized to  $\beta$ -actin loading controls. (**C–H**) Densitometric analyses of western blots reveal that total (nonphosphorylated and phosphorylated) hTERT protein levels decrease and the proportion of phospho-TERT increases in hESCs cultured in 20% O<sub>2</sub> compared with those grown in 2% O<sub>2</sub> conditions. Error bars represent SE,  $n=2$ , \* $P<0.05$ .
