# Supplementary material
Source: PubMed Central journal article supplement (PMC4142780)
Supplement: Supp_Fig5.pdf [file Supp_Fig5.pdf]

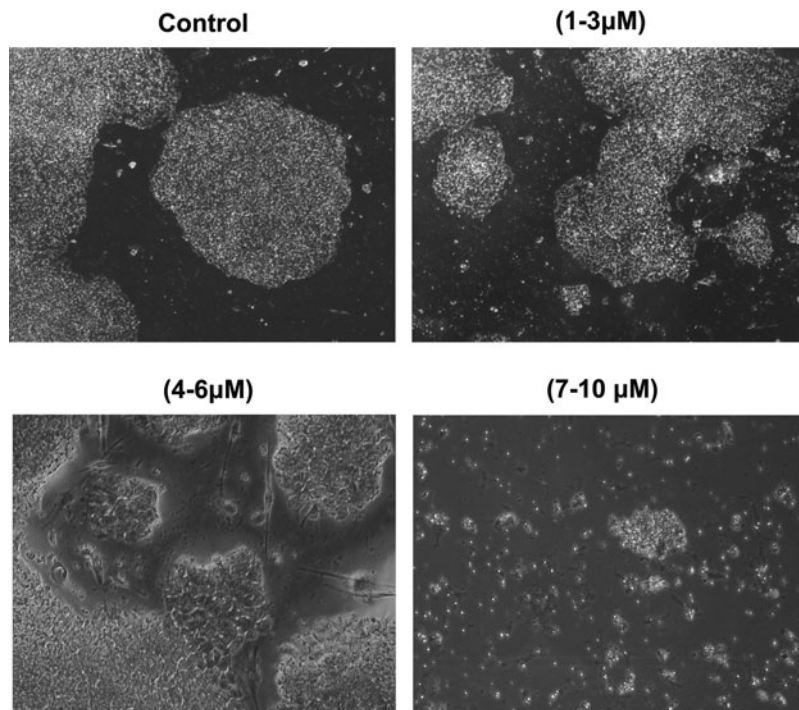

**SUPPLEMENTARY FIG. S5.** Dose-response effect of telomerase inhibition by phosphorothioate oligonucleotide (PS-ODN) telomere mimic in hESCs. Representative microscopic images of hESCs treated with increasing doses (nontreated controls; 1–3 μM, 4–6, and 7–10 μM) of telomerase inhibitor III (TI-III; Calbiochem), a cell-permeable hexameric PS-ODN compound that acts as a telomere mimic resulting in telomerase activity inhibition. At relatively high doses (7–10 μM) TI-III caused obvious cell death. Doses of 3 and 5 μM were utilized in this study. A similar dose-response treatment regime was carried out for telomerase inhibitor IX (TI-IX), a synthetic tea catechin, which showed noticeable cell death at concentrations >20 μM (data not shown).
