# Supplementary material
Source: PubMed Central journal article supplement (PMC4142780)
Supplement: Supp_Fig6.pdf [file Supp_Fig6.pdf]

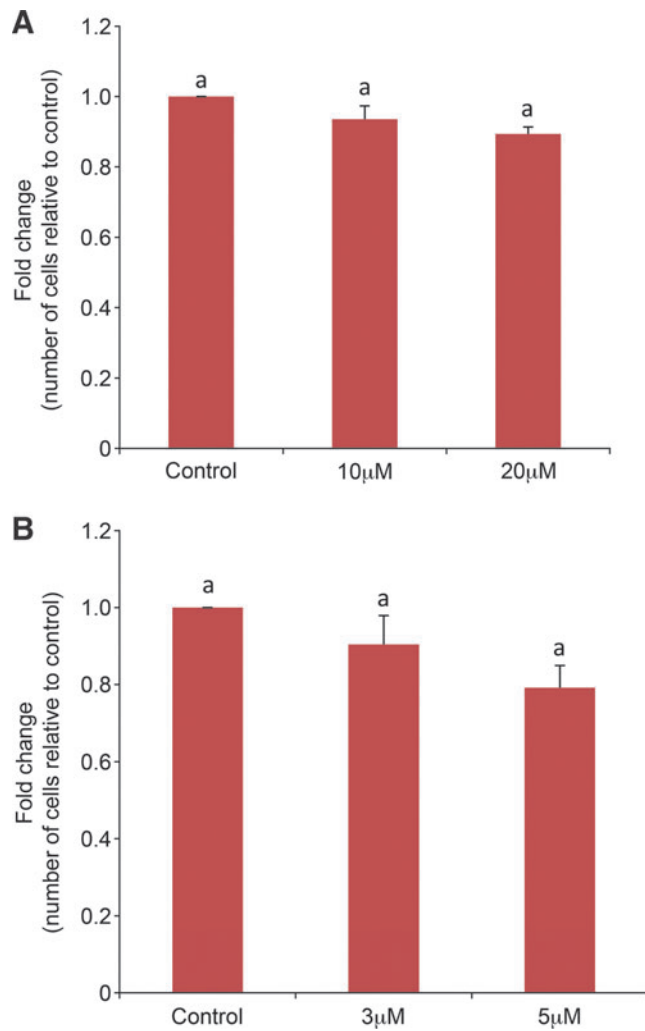

**SUPPLEMENTARY FIG. S6.** Dose-response effect of TI-IX and TI-III on cell viability of hESCs. hESCs were grown in feeder-free conditions in 20% O<sub>2</sub> for a total of 96 h treated with varying doses of TI-IX (**A**) and TI-III (**B**). Viability was determined using 7-aminoactinomycin D (7-AAD) DNA staining followed by flow cytometry analysis. Cell populations were gated based on 7-AAD exclusion (7-AAD excludes nonviable cells in flow cytometric assays). Mean fluorescence intensity plots derived from flow cytometry data representing fold change in number of live cells. Error bars represent SE,  $n=3$ . Letters above histogram bars indicate no significant differences ( $P>0.05$ ) in viable cells between groups.
