# Supplementary material
Source: PubMed Central journal article supplement (PMC4142780)
Supplement: Supp_Fig7.pdf [file Supp_Fig7.pdf]

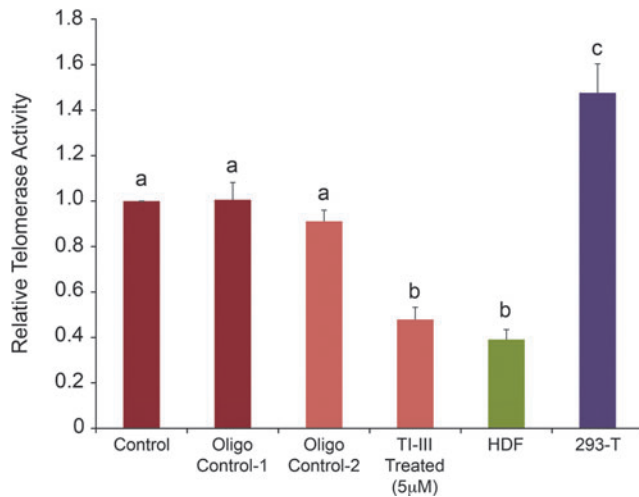

**SUPPLEMENTARY FIG. S7.** Telomerase PS-ODN inhibitor (TI-III) specifically inhibits telomerase activity levels. H9 hESCs were grown in feeder-free conditions in 20% O<sub>2</sub> and treated with a small-molecule PS-ODN inhibitor specific for the telomerase RNA component (TERC) subunit of telomerase (TI-III; Calbiochem), and two PS-ODN-oligo control compounds as negative controls. Relative telomerase activity levels of whole-cell lysates as measured by the real-time quantitative TRAP (RQ-TRAP) assay. Error bars represent SE,  $n=3$ . Different *letters* above histogram bars indicate significant differences ( $P<0.05$ ) in mean relative telomerase activity levels. Negative controls: HDF. Positive controls: 293-T, human embryonic kidney (HEK) cells with SV40 large T-antigen. TRAP, telomeric repeat amplification protocol.
