# Supplementary material
Source: PubMed Central journal article supplement (PMC4142780)
Supplement: Supp_Table1.pdf [file Supp_Table1.pdf]

SUPPLEMENTARY TABLE S1. REAL-TIME POLYMERASE CHAIN REACTION PRIMER INFORMATION

| <i>Target</i>                                            | <i>Assay ID<sup>a</sup></i> | <i>NCBI gene reference</i> |
|----------------------------------------------------------|-----------------------------|----------------------------|
| Alpha-fetoprotein (AFP)                                  | Hs00173490_m1               | NM_001134.1                |
| GATA binding protein 4 (GATA4)                           | Hs00171403_m1               | NM_002052.3                |
| T, brachyury homolog (mouse)                             | Hs00610080_m1               | NM_003181.2                |
| GATA binding protein 6 (GATA6)                           | Hs00232018_m1               | NM_005257.3                |
| Paired box 6 (PAX6)                                      | Hs01088112_m1               | NM_001127612.1             |
| Neurogenic differentiation factor 1 (NeuroD1)            | Hs00159598_m1               | NM_002500.2                |
| Pou class 5 homeobox 1 (POU5F1; Oct3/4)                  | Hs00742896_s1               | NM_203289.3                |
| Nanog homeobox (Nanog)                                   | Hs02387400_g1               | NM_024865.2                |
| Human RPLPO (large ribosomal protein) endogenous control | Hs99999902_m1               | NM_053275.3                |
| X-inactive specific transcript (XIST)                    | Hs01079824_m1               | CR749383<br>BX648323       |

<sup>a</sup>TaqMan<sup>®</sup> Gene Expression Assay (Life Technologies).
